# Supplementary material for: A Comparative Study of Milk Fat Extracted from the Milk of Different Goat Breeds in China: Fatty Acids, Triacylglycerols and Thermal and Spectroscopic Characterization
Source: MDPI journal article supplement (doi:10.3390/biom12050730), 2022-05-22
Supplement: s1 [file s1]

## Article

# A Comparative Study of Milk Fat Extracted from the Milk of Different Goat Breeds in China: Fatty Acids, Triacylglycerols and Thermal and Spectroscopic Characterization

Sameh A. Korma <sup>1,2</sup>, Li Li <sup>1,3,\*</sup>, Wei Wei <sup>4,\*</sup>, Pengzhan Liu <sup>1</sup>, Xinghe Zhang <sup>4</sup>, Ibrahim A. Bakry <sup>5</sup>, Peipei An <sup>1</sup>, Khaled A. E. Abdrabo <sup>1</sup>, Muhammad Faisal Manzoor <sup>1</sup>, Muhammad Umair <sup>6</sup>, Ilaria Cacciotti <sup>7</sup>, José M. Lorenzo <sup>8,9</sup> and Carlos Adam Conte-Junior <sup>10</sup>

<sup>1</sup> School of Food Science and Engineering, South China University of Technology, Guangzhou 510641, China; sameh.hosny@zu.edu.eg (S.A.K.); lpzhan@scut.edu.cn (P.L.); hyzw1110@163.com (P.A.); abdrabo@aun.edu.eg (K.A.E.A.); 201712800025@mail.scut.edu.cn (M.F.M.)

<sup>2</sup> Department of Food Science, Faculty of Agriculture, Zagazig University, 44519 Zagazig, Egypt

<sup>3</sup> Sino-Singapore International Joint Research Institute, Guangzhou 510000, China

<sup>4</sup> School of Food Science and Technology, Jiangnan University, Wuxi 214122, China; zhangxinghe\_wx@163.com

<sup>5</sup> Department of Food and Dairy Technology, Faculty of Technology and Development, Zagazig University, 44519 Zagazig, Egypt; ibrahimbakry@zu.edu.eg

<sup>6</sup> Department of Food Science and Engineering, College of Chemistry and Engineering, Shenzhen University, Shenzhen 518060, China; umair@szu.edu.cn

<sup>7</sup> Department of Engineering, INSTM RU, University of Rome “Niccolò Cusano”, 00166 Roma, Italy; ilaria.cacciotti@unicusano.it

<sup>8</sup> Centro Tecnológico de La Carne de Galicia, Avd. Galicia N° 4, Parque Tecnológico de Galicia, San Cibrao das Viñas, 32900 Ourense, Spain; jmlorenzo@ceteca.net

<sup>9</sup> Facultad de Ciencias de Ourense, Área de Tecnología de los Alimentos, Universidade de Vigo, 32004 Ourense, Spain

<sup>10</sup> Center for Food Analysis (NAL), Technological Development Support Laboratory (LADETEC), Federal University of Rio de Janeiro (UFRJ), Cidade Universitária, Rio de Janeiro 21941-598, Brazil; conte@iq.ufrj.br

\* Correspondence: lili@scut.edu.cn (L.L.); weiw@jiangnan.edu.cn (W.W.); Tel.: +86-208-711-4262 (L.L.); +86-510-858-767-99 (W.W.)

**Table S1.** Composition and relative content (%) of TAGs in goat milk fat samples identified according to  $[M + NH_4]^+$  by using UPCC-Q-TOF-MS with supercritical carbon dioxide as a mobile phase.

| tr (min) | Mass<br>observed<br>(m/z) | Molecular<br>formula                                         | Identified<br>TAGs | [DAG] <sup>+</sup> fragment ions ([M-FA + H] <sup>+</sup> )                                        | Relative content (%)     |                   | AC<br>N:D<br>B |
|----------|---------------------------|--------------------------------------------------------------|--------------------|----------------------------------------------------------------------------------------------------|--------------------------|-------------------|----------------|
|          |                           |                                                              |                    |                                                                                                    | GZG *                    | XSG **            |                |
| 4.033    | 488.3759                  | C <sub>27</sub> H <sub>54</sub> NO <sub>6</sub> <sup>+</sup> | La-Cy-Bu           | [Bu-Cy] <sup>+</sup> :271.1769; [La-Bu] <sup>+</sup> :327.2471; [La-Cy]<br><sup>+</sup> :383.3165  | 0.04 ± 0.00              | ND                | 24:0           |
|          |                           |                                                              | Ca-Ca-Bu           | [Ca-Bu] <sup>+</sup> :299.2217; [Ca-Ca] <sup>+</sup> :383.3165                                     |                          |                   |                |
|          |                           |                                                              | Cy-Cy-Cy           | [Cy-Cy] <sup>+</sup> :327.2471                                                                     |                          |                   |                |
| 4.155    | 516.4219                  | C <sub>29</sub> H <sub>58</sub> NO <sub>6</sub> <sup>+</sup> | P-Co-Bu            | [Bu-Co] <sup>+</sup> :243.1501; [P-Bu] <sup>+</sup> :383.3159; [P-Co] <sup>+</sup> :411.3453       | 0.94 ± 0.02 <sup>a</sup> | 0.21 ±            | 26:0           |
|          |                           |                                                              | La-Ca-Bu           | [Bu-Ca] <sup>+</sup> :299.2251; [La-Bu] <sup>+</sup> :327.2584; [La-Ca] <sup>+</sup> :<br>411.3453 |                          | 0.02 <sup>b</sup> |                |
|          |                           |                                                              | La-Cy-Co           | [Co-Cy] <sup>+</sup> :299.2251; [La-Co] <sup>+</sup> :355.2927; [La-Cy]<br><sup>+</sup> :383.3159  |                          |                   |                |
|          |                           |                                                              | Ca-Cy-Cy           | [Cy-Cy] <sup>+</sup> :327.2584; [Ca-Cy] <sup>+</sup> :355.2927                                     |                          |                   |                |
|          |                           |                                                              | Ca-Ca-Co           | [Ca-Co] <sup>+</sup> :327.2584; [Ca-Ca] <sup>+</sup> :383.3159                                     |                          |                   |                |
|          |                           |                                                              | M-Cy-Bu            | [Bu-Cy] <sup>+</sup> :271.199; [M-Bu] <sup>+</sup> :355.2927; [M-Cy] <sup>+</sup> :411.3453        |                          |                   |                |
|          |                           |                                                              | S-Bu-Bu            | [S-Bu] <sup>+</sup> :411.3453; [Bu-Bu] <sup>+</sup> :215.1276                                      |                          |                   |                |
|          |                           |                                                              | Ud-Bu-Ud           | [Ud-Bu] <sup>+</sup> :313.2854; [Ud-Ud] <sup>+</sup> :411.3453                                     |                          |                   |                |
| 4.345    | 544.4544                  | C <sub>31</sub> H <sub>62</sub> NO <sub>6</sub> <sup>+</sup> | P-Co-Co            | [P-Co] <sup>+</sup> :411.3515; [Co-Co] <sup>+</sup> :271.1956                                      | 0.17 ± 0.00 <sup>b</sup> | 0.28 ±            | 28:0           |
|          |                           |                                                              | La-Cy-Cy           | [La-Cy] <sup>+</sup> :383.3175; [Cy-Cy] <sup>+</sup> :327.2553                                     |                          | 0.01 <sup>a</sup> |                |
|          |                           |                                                              | Ca-Ca-Cy           | [Ca-Cy] <sup>+</sup> :355.2854; [Ca-Ca] <sup>+</sup> :383.3175                                     |                          |                   |                |
|          |                           |                                                              | La-Ca-Co           | [Co-Ca] <sup>+</sup> :327.2553; [La-Co] <sup>+</sup> :355.2854; [La-Ca] <sup>+</sup> :411.3515     |                          |                   |                |
|          |                           |                                                              | Ud-Co-Ud           | [Ud-Co] <sup>+</sup> :341.2854; [Ud-Ud] <sup>+</sup> : 411.3515                                    |                          |                   |                |
| 4.555    | 544.4552                  | C <sub>31</sub> H <sub>62</sub> NO <sub>6</sub> <sup>+</sup> | P-Cy-Bu            | [Bu-Cy] <sup>+</sup> :271.1963; [P-Bu] <sup>+</sup> :383.3179; [P-Cy] <sup>+</sup> :439.3792       | 0.68 ± 0.01 <sup>b</sup> | 1.08 ±            | 28:0           |
|          |                           |                                                              | M-Ca-Bu            | [Bu-Ca] <sup>+</sup> :299.2235; [M-Bu] <sup>+</sup> :355.2839; [M-Ca] <sup>+</sup> :439.3792       |                          | 0.02 <sup>a</sup> |                |
|          |                           |                                                              | La-La-Bu           | [La-Bu] <sup>+</sup> :327.2560; [La-La] <sup>+</sup> :439.3792                                     |                          |                   |                |
|          |                           |                                                              | Ca-Ca-Cy           | [Ca-Cy] <sup>+</sup> :355.2839; [Ca-Ca] <sup>+</sup> :383.3179                                     |                          |                   |                |
|          |                           |                                                              | La-Cy-Cy           | [La-Cy] <sup>+</sup> :383.3179; [Cy-Cy] <sup>+</sup> :327.2560                                     |                          |                   |                |
| 4.741    | 572.4848                  | C <sub>33</sub> H <sub>66</sub> NO <sub>6</sub> <sup>+</sup> | P-Cy-Co            | [Co-Cy] <sup>+</sup> :299.2246; [P-Co] <sup>+</sup> :411.3457; [P-Cy] <sup>+</sup> :439.3794       | 0.59 ± 0.00 <sup>a</sup> | 0.43 ±            | 30:0           |
|          |                           |                                                              | M-Ca-Co            | [Co-Ca] <sup>+</sup> :327.2537; [M-Co] <sup>+</sup> :383.3163; [M-Ca] <sup>+</sup> :439.3794       |                          | 0.02 <sup>b</sup> |                |
|          |                           |                                                              | M-Cy-Cy            | [M-Cy] <sup>+</sup> :411.3457; [Cy-Cy] <sup>+</sup> :327.2537                                      |                          |                   |                |
|          |                           |                                                              | La-Ca-Cy           | [Cy-Ca] <sup>+</sup> :355.2892; [La-Cy] <sup>+</sup> :383.3163; [La-Ca]<br><sup>+</sup> :411.3457  |                          |                   |                |
|          |                           |                                                              | Ca-Ca-Ca           | [Ca-Ca] <sup>+</sup> :383.3163                                                                     |                          |                   |                |
|          |                           |                                                              | S-Co-Co            | [S-Co] <sup>+</sup> :439.3794; [Co-Co] <sup>+</sup> :271.1898                                      |                          |                   |                |
| 4.902    | 572.4843                  | C <sub>33</sub> H <sub>66</sub> NO <sub>6</sub> <sup>+</sup> | P-Ca-Bu            | [Bu-Ca] <sup>+</sup> :299.2225; [P-Bu] <sup>+</sup> :383.3154; [P-Ca] <sup>+</sup> :467.4089       | 2.92 ± 0.07 <sup>a</sup> | 2.81 ±            | 30:0           |
|          |                           |                                                              |                    |                                                                                                    |                          | 0.12 <sup>a</sup> |                |
| 5.056    | 570.4728                  | C <sub>33</sub> H <sub>64</sub> NO <sub>6</sub> <sup>+</sup> | O-Cy-Bu            | [Bu-Cy] <sup>+</sup> :271.1865; [O-Bu] <sup>+</sup> :409.3291; [O-Cy] <sup>+</sup> :465.3960       | ND                       | 0.05 ± 0.01       | 30:1           |
|          |                           |                                                              | Po-Ca-Bu           | [Bu-Ca] <sup>+</sup> :299.2219; [Po-Bu] <sup>+</sup> :381.3013; [Po-Ca] <sup>+</sup> :465.3960     |                          |                   |                |
| 5.139    | 600.5118                  | C <sub>35</sub> H <sub>70</sub> NO <sub>6</sub> <sup>+</sup> | P-Ca-Co            | [Co-Ca] <sup>+</sup> :327.25301; [P-Co] <sup>+</sup> :411.3429; [P-Ca] <sup>+</sup> :467.4076      | 0.93 ± 0.01 <sup>b</sup> | 1.31 ±            | 32:0           |
|          |                           |                                                              | P-Cy-Cy            | [Cy-Cy] <sup>+</sup> :327.25301; [P-Cy] <sup>+</sup> :439.3754                                     |                          | 0.04 <sup>a</sup> |                |

|       |          |                                                              |          |                                                                                                |                          |                   |      |
|-------|----------|--------------------------------------------------------------|----------|------------------------------------------------------------------------------------------------|--------------------------|-------------------|------|
|       |          |                                                              | M-La-Co  | [Co-La] <sup>+</sup> :355.2838; [M-Co] <sup>+</sup> :383.3129; [M-La] <sup>+</sup> :467.4076   |                          |                   |      |
|       |          |                                                              | M-Ca-Cy  | [Cy-Ca] <sup>+</sup> :355.2838; [M-Cy] <sup>+</sup> :411.3429; [M-Ca] <sup>+</sup> :439.3754   |                          |                   |      |
|       |          |                                                              | La-La-Cy | [Cy-La] <sup>+</sup> :383.3129; [La-La] <sup>+</sup> :439.3754                                 |                          |                   |      |
|       |          |                                                              | La-Ca-Ca | [Ca-Ca] <sup>+</sup> :383.3129; [La-Ca] <sup>+</sup> :411.3429                                 |                          |                   |      |
|       |          |                                                              | S-Cy-Co  | [Co-Cy] <sup>+</sup> :299.2258; [S-Co] <sup>+</sup> :439.3754; [S-Cy] <sup>+</sup> :467.4076   |                          |                   |      |
| 5.367 | 600.5179 | C <sub>35</sub> H <sub>70</sub> NO <sub>6</sub> <sup>+</sup> | P-La-Bu  | [Bu-La] <sup>+</sup> :327.2537; [P-Bu] <sup>+</sup> :383.3147; [P-La] <sup>+</sup> :495.4394   | 1.27 ± 0.02 <sup>a</sup> | 0.12 ±            | 32:0 |
|       |          |                                                              | M-M-Bu   | [Bu-M] <sup>+</sup> :355.2854; [M-M] <sup>+</sup> :495.4394                                    |                          | 0.01 <sup>b</sup> |      |
|       |          |                                                              | S-Ca-Bu  | [Bu-Ca] <sup>+</sup> :299.2253; [S-Bu] <sup>+</sup> :411.3483; [S-Ca] <sup>+</sup> :495.4394   |                          |                   |      |
|       |          |                                                              | La-Ca-Ca | [Ca-La] <sup>+</sup> :411.3483; [Ca-Ca] <sup>+</sup> :383.3147                                 |                          |                   |      |
| 5.495 | 598.5066 | C <sub>35</sub> H <sub>68</sub> NO <sub>6</sub> <sup>+</sup> | O-Ca-Bu  | [Bu-Ca] <sup>+</sup> :299.2244; [O-Bu] <sup>+</sup> :409.3343; [O-Ca] <sup>+</sup> :493.4273   | 0.18 ± 0.00 <sup>a</sup> | 0.17 ±            | 32:1 |
|       |          |                                                              | Po-La-Bu | [Bu-La] <sup>+</sup> :327.2544; [Po-Bu] <sup>+</sup> :381.3107; [Po-La] <sup>+</sup> :493.4273 |                          | 0.01 <sup>a</sup> |      |
|       |          |                                                              | Po-Ca-Co | [Co-Ca] <sup>+</sup> :327.2544; [Po-Co] <sup>+</sup> :409.3343; [Po-Ca] <sup>+</sup> :465.4074 |                          |                   |      |
|       |          |                                                              | Mo-La-Co | [Co-La] <sup>+</sup> :355.2873; [Mo-Co] <sup>+</sup> :381.3107; [Mo-La] <sup>+</sup> :465.4074 |                          |                   |      |
|       |          |                                                              | Lo-Ca-Ca | [Lo-Ca] <sup>+</sup> :409.3343; [Ca-Ca] <sup>+</sup> :383.3162                                 |                          |                   |      |
|       |          |                                                              | La-Ca-De | [De-Ca] <sup>+</sup> :381.3107; [La-De] <sup>+</sup> :409.3343; [La-Ca] <sup>+</sup> :411.3531 |                          |                   |      |
| 5.549 | 614.5391 | C <sub>36</sub> H <sub>72</sub> NO <sub>6</sub> <sup>+</sup> | Ma-Ca-Co | [Co-Ca] <sup>+</sup> :327.2544; [Ma-Co] <sup>+</sup> :425.3617; [Ma-Ca] <sup>+</sup> :481.4270 | 0.12 ± 0.00 <sup>a</sup> | 0.12 ±            | 33:0 |
|       |          |                                                              | Ma-Cy-Cy | [Ma-Cy] <sup>+</sup> :453.3994; [Cy-Cy] <sup>+</sup> :327.2544                                 |                          | 0.02 <sup>a</sup> |      |
|       |          |                                                              | Pe-Ca-Cy | [Cy-Ca] <sup>+</sup> :355.2870; [Pe-Cy] <sup>+</sup> :425.3617; [Pe-Ca] <sup>+</sup> :453.3994 |                          |                   |      |
| 5.604 | 628.5483 | C <sub>37</sub> H <sub>74</sub> NO <sub>6</sub> <sup>+</sup> | P-La-Co  | [Co-La] <sup>+</sup> :355.28939; [P-Co] <sup>+</sup> :411.3463; [P-La] <sup>+</sup> :495.4414  | 4.12 ± 0.07 <sup>a</sup> | 2.20 ±            | 34:0 |
|       |          |                                                              | M-Ca-Ca  | [M-Ca] <sup>+</sup> :439.3770; [Ca-Ca] <sup>+</sup> :383.3161                                  |                          | 0.08 <sup>b</sup> |      |
|       |          |                                                              | M-M-Co   | [M-Co] <sup>+</sup> :383.3161; [M-M] <sup>+</sup> :495.4414                                    |                          |                   |      |
|       |          |                                                              | M-La-Cy  | [Cy-La] <sup>+</sup> :383.3161; [M-Cy] <sup>+</sup> :411.3463; [M-La] <sup>+</sup> :467.4114   |                          |                   |      |
|       |          |                                                              | La-La-Ca | [La-Ca] <sup>+</sup> :411.3463; [La-La] <sup>+</sup> :439.3770                                 |                          |                   |      |
|       |          |                                                              | P-Ca-Cy  | [Cy-Ca] <sup>+</sup> :355.28939; [P-Cy] <sup>+</sup> :439.3770; [P-Ca] <sup>+</sup> :467.4114  |                          |                   |      |
|       |          |                                                              | S-Ca-Co  | [Co-Ca] <sup>+</sup> :327.2541; [S-Co] <sup>+</sup> :439.3770; [S-Ca] <sup>+</sup> :495.4414   |                          |                   |      |
| 5.850 | 628.5479 | C <sub>37</sub> H <sub>74</sub> NO <sub>6</sub> <sup>+</sup> | P-M-Bu   | [Bu-M] <sup>+</sup> :355.2832; [P-Bu] <sup>+</sup> :383.315; [P-M] <sup>+</sup> :523.4709      | 2.03 ± 0.03 <sup>a</sup> | 1.81 ±            | 34:0 |
|       |          |                                                              |          |                                                                                                |                          | 0.09 <sup>b</sup> |      |
| 6.004 | 626.5367 | C <sub>37</sub> H <sub>72</sub> NO <sub>6</sub> <sup>+</sup> | O-La-Bu  | [Bu-La] <sup>+</sup> :327.2559; [O-Bu] <sup>+</sup> :409.3293; [O-La] <sup>+</sup> :521.4564   | 0.41 ± 0.02 <sup>a</sup> | 0.43 ±            | 34:1 |
|       |          |                                                              | P-Mo-Bu  | [Bu-Mo] <sup>+</sup> :353.2786; [P-Bu] <sup>+</sup> :383.3224; [P-Mo] <sup>+</sup> :521.4564   |                          | 0.04 <sup>a</sup> |      |
|       |          |                                                              | P-De-Cy  | [Cy-De] <sup>+</sup> :353.2786; [P-Cy] <sup>+</sup> :439.3788; [P-De] <sup>+</sup> :465.3951   |                          |                   |      |
|       |          |                                                              | Po-M-Bu  | [Bu-M] <sup>+</sup> :355.2857; [Po-Bu] <sup>+</sup> :381.3018; [Po-M] <sup>+</sup> :521.4564   |                          |                   |      |
|       |          |                                                              | Po-Ca-Cy | [Cy-Ca] <sup>+</sup> :355.2857; [Po-Cy] <sup>+</sup> :437.3664; [Po-Ca] <sup>+</sup> :465.3951 |                          |                   |      |
|       |          |                                                              | Mo-La-Cy | [Cy-La] <sup>+</sup> :383.3224; [Mo-Cy] <sup>+</sup> :409.3293; [Mo-La] <sup>+</sup> :465.3951 |                          |                   |      |
|       |          |                                                              | Mo-Ca-Ca | [Ca-Ca] <sup>+</sup> :383.3224; [Mo-Ca] <sup>+</sup> :437.3664                                 |                          |                   |      |
|       |          |                                                              | La-La-De | [De-La] <sup>+</sup> :409.3293; [La-La] <sup>+</sup> :439.3788                                 |                          |                   |      |
|       |          |                                                              | Lo-M-Cy  | [Cy-M] <sup>+</sup> :411.3304; [Lo-Cy] <sup>+</sup> :381.3018; [Lo-M] <sup>+</sup> :465.3951   |                          |                   |      |
|       |          |                                                              | Lo-La-Ca | [Ca-La] <sup>+</sup> :411.3304; [Lo-Ca] <sup>+</sup> :409.3293; [Lo-La] <sup>+</sup> :437.3664 |                          |                   |      |
| 6.045 | 642.5677 | C <sub>38</sub> H <sub>76</sub> NO <sub>6</sub> <sup>+</sup> | Ma-La-Co | [Co-La] <sup>+</sup> :355.2813; [Ma-Co] <sup>+</sup> :425.3704; [Ma-La] <sup>+</sup> :509.449  | 0.40 ± 0.01 <sup>a</sup> | 0.42 ±            | 35:0 |
|       |          |                                                              | Ma-Ca-Cy | [Cy-Ca] <sup>+</sup> :355.2813; [Ma-Cy] <sup>+</sup> :453.3948; [Ma-Ca] <sup>+</sup> :481.4268 |                          | 0.02 <sup>a</sup> |      |

|       |          |                                                              |          |                                                                                                |                          |                   |      |
|-------|----------|--------------------------------------------------------------|----------|------------------------------------------------------------------------------------------------|--------------------------|-------------------|------|
|       |          |                                                              | P-Tr-Co  | [Co-Tr] <sup>+</sup> :369.32967; [P-Co] <sup>+</sup> :411.3529; [P-Tr] <sup>+</sup> :509.449   |                          |                   |      |
|       |          |                                                              | Pe-M-Co  | [Co-M] <sup>+</sup> :383.3180; [Pe-Co] <sup>+</sup> :397.3285; [Pe-M] <sup>+</sup> :509.449    |                          |                   |      |
|       |          |                                                              | Pe-La-Cy | [Cy-La] <sup>+</sup> :383.3180; [Pe-Cy] <sup>+</sup> :425.3704; [Pe-La] <sup>+</sup> :481.4268 |                          |                   |      |
|       |          |                                                              | Pe-Ca-Ca | [Ca-Ca] <sup>+</sup> :383.3180; [Pe-Ca] <sup>+</sup> :453.3948                                 |                          |                   |      |
|       |          |                                                              | Tr-La-Ca | [Ca-La] <sup>+</sup> :411.3529; [Tr-Ca] <sup>+</sup> :425.3704; [Tr-La] <sup>+</sup> :453.3948 |                          |                   |      |
|       |          |                                                              | Ma-M-Bu  | [Bu-M] <sup>+</sup> :355.2813; [Ma-Bu] <sup>+</sup> :397.3285; [Ma-M] <sup>+</sup> :537.4912   |                          |                   |      |
|       |          |                                                              | P-Pe-Bu  | [Bu-Pe] <sup>+</sup> :369.32967; [P-Bu] <sup>+</sup> :383.3180; [P-Pe] <sup>+</sup> :537.4912  |                          |                   |      |
| 6.087 | 656.5759 | C <sub>39</sub> H <sub>78</sub> NO <sub>6</sub> <sup>+</sup> | S-La-Co  | [Co-La] <sup>+</sup> :355.2856; [S-Co] <sup>+</sup> :439.3773; [S-La] <sup>+</sup> :523.4716   | 2.21 ± 0.05 <sup>a</sup> | 0.16 ±            | 36:0 |
|       |          |                                                              | S-Ca-Cy  | [Cy-Ca] <sup>+</sup> :355.2856; [S-Cy] <sup>+</sup> :467.4088; [S-Ca] <sup>+</sup> :495.4409   |                          | 0.01 <sup>b</sup> |      |
|       |          |                                                              | P-M-Co   | [Co-M] <sup>+</sup> :383.3148; [P-Co] <sup>+</sup> :411.3462; [P-M] <sup>+</sup> :523.4716     |                          |                   |      |
|       |          |                                                              | P-Ca-Ca  | [Ca-Ca] <sup>+</sup> :383.3148; [P-Ca] <sup>+</sup> :467.4088                                  |                          |                   |      |
|       |          |                                                              | La-La-La | [La-La] <sup>+</sup> :439.3773                                                                 |                          |                   |      |
|       |          |                                                              | P-La-Cy  | [Cy-La] <sup>+</sup> :383.3148; [P-Cy] <sup>+</sup> :439.3773; [P-La] <sup>+</sup> :495.4409   |                          |                   |      |
|       |          |                                                              | M-M-Cy   | [Cy-M] <sup>+</sup> :411.3462; [M-M] <sup>+</sup> :495.4409                                    |                          |                   |      |
|       |          |                                                              | M-La-Ca  | [Ca-La] <sup>+</sup> :411.3462; [M-Ca] <sup>+</sup> :439.3773; [M-La] <sup>+</sup> :467.4088   |                          |                   |      |
| 6.324 | 656.5784 | C <sub>39</sub> H <sub>78</sub> NO <sub>6</sub> <sup>+</sup> | P-P-Bu   | [Bu-P] <sup>+</sup> :383.3160; [P-P] <sup>+</sup> :551.5031                                    | 3.66 ± 0.06 <sup>b</sup> | 4.12 ±            | 36:0 |
|       |          |                                                              | S-M-Bu   | [Bu-M] <sup>+</sup> :355.2828; [S-Bu] <sup>+</sup> :411.3481; [S-M] <sup>+</sup> :551.5031     |                          | 0.21 <sup>a</sup> |      |
| 5.561 | 654.5667 | C <sub>39</sub> H <sub>76</sub> NO <sub>6</sub> <sup>+</sup> | O-M-Bu   | [Bu-M] <sup>+</sup> :355.2864; [O-Bu] <sup>+</sup> :409.3323; [O-M] <sup>+</sup> :549.4913     | 0.31 ± 0.03 <sup>b</sup> | 0.73 ±            | 36:1 |
|       |          |                                                              | P-Ca-De  | [De-Ca] <sup>+</sup> :381.3026; [P-De] <sup>+</sup> :465.3986; [P-Ca] <sup>+</sup> :467.3167   |                          | 0.02 <sup>a</sup> |      |
|       |          |                                                              | Po-Ca-Ca | [Ca-Ca] <sup>+</sup> :383.3195; [Po-Ca] <sup>+</sup> :465.3986                                 |                          |                   |      |
|       |          |                                                              | S-Mo-Bu  | [Bu-Mo] <sup>+</sup> :353.2727; [S-Bu] <sup>+</sup> :411.3439; [S-Mo] <sup>+</sup> :549.4913   |                          |                   |      |
| 6.179 | 670.6010 | C <sub>40</sub> H <sub>80</sub> NO <sub>6</sub> <sup>+</sup> | Ma-M-Co  | [Co-M] <sup>+</sup> :383.3148; [Ma-Co] <sup>+</sup> :425.3634; [Ma-M] <sup>+</sup> :537.4920   | 0.77 ± 0.02 <sup>b</sup> | 1.02 ±            | 37:0 |
|       |          |                                                              | Ma-La-Cy | [Cy-La] <sup>+</sup> :383.3148; [Ma-Cy] <sup>+</sup> :453.3986; [Ma-La] <sup>+</sup> :509.4580 |                          | 0.00 <sup>a</sup> |      |
|       |          |                                                              | Ma-Ca-Ca | [Ca-Ca] <sup>+</sup> :383.3148; [Ma-Ca] <sup>+</sup> :481.4275                                 |                          |                   |      |
|       |          |                                                              | P-Pe-Co  | [Co-Pe] <sup>+</sup> :397.3317; [P-Co] <sup>+</sup> :411.3488; [P-Pe] <sup>+</sup> :537.4920   |                          |                   |      |
|       |          |                                                              | Pe-M-Cy  | [Cy-M] <sup>+</sup> :411.3488; [Pe-Cy] <sup>+</sup> :425.3634; [Pe-M] <sup>+</sup> :509.4580   |                          |                   |      |
|       |          |                                                              | Pe-La-Ca | [Ca-La] <sup>+</sup> :411.3488; [Pe-Ca] <sup>+</sup> :453.3986; [Pe-La] <sup>+</sup> :481.4275 |                          |                   |      |
| 6.446 | 668.5842 | C <sub>40</sub> H <sub>78</sub> NO <sub>6</sub> <sup>+</sup> | O-Pe-Bu  | [Bu-Pe] <sup>+</sup> :369.3046; [O-Bu] <sup>+</sup> :409.3241; [O-Pe] <sup>+</sup> :563.5032   | 0.24 ± 0.02 <sup>a</sup> | 0.20 ±            | 37:1 |
|       |          |                                                              | H-P-Bu   | [Bu-P] <sup>+</sup> :383.3158; [H-Bu] <sup>+</sup> :395.3169; [H-P] <sup>+</sup> :563.5032     |                          | 0.00 <sup>b</sup> |      |
| 6.798 | 684.6094 | C <sub>41</sub> H <sub>82</sub> NO <sub>6</sub> <sup>+</sup> | S-M-Co   | [Co-M] <sup>+</sup> :383.3141; [S-Co] <sup>+</sup> :439.3789; [S-M] <sup>+</sup> :551.5022     | 6.63 ± 0.01 <sup>b</sup> | 10.94 ±           | 38:0 |
|       |          |                                                              | S-La-Cy  | [Cy-La] <sup>+</sup> :383.3141; [S-Cy] <sup>+</sup> :467.4089; [S-La] <sup>+</sup> :523.4722   |                          | 0.02 <sup>a</sup> |      |
|       |          |                                                              | S-Ca-Ca  | [Ca-Ca] <sup>+</sup> :383.3141; [S-Ca] <sup>+</sup> :495.4402                                  |                          |                   |      |
|       |          |                                                              | P-P-Co   | [Co-P] <sup>+</sup> :411.3452; [P-P] <sup>+</sup> :551.5022                                    |                          |                   |      |
|       |          |                                                              | P-M-Cy   | [Cy-M] <sup>+</sup> :411.3452; [P-Cy] <sup>+</sup> :439.3789; [P-M] <sup>+</sup> :523.4722     |                          |                   |      |
|       |          |                                                              | P-La-Ca  | [Ca-La] <sup>+</sup> :411.3452; [P-Ca] <sup>+</sup> :467.4089; [P-La] <sup>+</sup> :495.4402   |                          |                   |      |
|       |          |                                                              | M-M-Ca   | [Ca-M] <sup>+</sup> :439.3789; [M-M] <sup>+</sup> :495.4402                                    |                          |                   |      |
|       |          |                                                              | M-La-La  | [La-La] <sup>+</sup> :439.3789; [M-La] <sup>+</sup> :467.4089                                  |                          |                   |      |
| 7.026 | 682.5958 | C <sub>41</sub> H <sub>80</sub> NO <sub>6</sub> <sup>+</sup> | O-P-Bu   | [Bu-P] <sup>+</sup> :383.3148; [O-Bu] <sup>+</sup> :409.3311; [O-P] <sup>+</sup> :577.5208     | 1.04 ± 0.01 <sup>b</sup> | 2.33 ±            | 38:1 |
|       |          |                                                              | Po-Ca-La | [La-Ca] <sup>+</sup> :411.3484; [Po-La] <sup>+</sup> :493.4255; [Po-Ca] <sup>+</sup> :465.3936 |                          | 0.09 <sup>a</sup> |      |
|       |          |                                                              | P-De-La  | [La-De] <sup>+</sup> :409.3311; [P-La] <sup>+</sup> :495.4426; [P-De] <sup>+</sup> :465.3936   |                          |                   |      |
|       |          |                                                              | Po-S-Bu  | [Bu-S] <sup>+</sup> :411.3484; [Po-Bu] <sup>+</sup> :381.3070; [Po-S] <sup>+</sup> :577.5208   |                          |                   |      |
| 7.381 | 712.6441 | C <sub>43</sub> H <sub>86</sub> NO <sub>6</sub> <sup>+</sup> | S-La-Ca  | [Ca-La] <sup>+</sup> :411.3467; [S-Ca] <sup>+</sup> :495.4438; [S-La] <sup>+</sup> :523.4278   |                          |                   | 40:0 |

|       |          |                                                              |          |                                                                                                |                          |                   |      |
|-------|----------|--------------------------------------------------------------|----------|------------------------------------------------------------------------------------------------|--------------------------|-------------------|------|
|       |          |                                                              | P-M-Ca   | [Ca-M] <sup>+</sup> :439.3803; [P-Ca] <sup>+</sup> :467.4105; [P-M] <sup>+</sup> :523.4278     | 10.49 ±                  | 9.30 ±            |      |
|       |          |                                                              | M-M-La   | [La-M] <sup>+</sup> :467.4105; [M-M] <sup>+</sup> :495.4438                                    | 0.15 <sup>a</sup>        | 0.40 <sup>b</sup> |      |
|       |          |                                                              | Co-S-P   | [P-S] <sup>+</sup> :579.5377; [Co-P] <sup>+</sup> :411.3467; [Co-S] <sup>+</sup> :439.3803     |                          |                   |      |
|       |          |                                                              | Cy-P-P   | [P-P] <sup>+</sup> :551.5048; [Cy-P] <sup>+</sup> :439.3803                                    |                          |                   |      |
|       |          |                                                              | Bu-S-S   | [S-S] <sup>+</sup> :607.5707; [Bu-S] <sup>+</sup> :411.3467                                    |                          |                   |      |
|       |          |                                                              | Ar-Ca-Ca | [Ca-Ca] <sup>+</sup> :383.3145; [Ar-Ca] <sup>+</sup> :523.4278                                 |                          |                   |      |
|       |          |                                                              | Ar-P-Bu  | [Bu-P] <sup>+</sup> :383.3145; [Ar-Bu] <sup>+</sup> :439.3803; [Ar-P] <sup>+</sup> :607.5707   |                          |                   |      |
|       |          |                                                              | Ar-La-Cy | [Cy-La] <sup>+</sup> :383.3145; [Ar-Cy] <sup>+</sup> :495.4438; [Ar-La] <sup>+</sup> :551.5048 |                          |                   |      |
| 7.508 | 710.6297 | C <sub>43</sub> H <sub>84</sub> NO <sub>6</sub> <sup>+</sup> | S-O-Bu   | [Bu-O] <sup>+</sup> :409.3309; [S-Bu] <sup>+</sup> :411.3476; [S-O] <sup>+</sup> :605.5447     | 3.41 ± 0.10 <sup>a</sup> | 3.69 ±            | 40:1 |
|       |          |                                                              | S-Po-Co  | [Co-Po] <sup>+</sup> :409.3309; [S-Co] <sup>+</sup> :439.3791; [S-Po] <sup>+</sup> :577.5255   |                          | 0.24 <sup>a</sup> |      |
|       |          |                                                              | S-Mo-Cy  | [Cy-Mo] <sup>+</sup> :409.3309; [S-Cy] <sup>+</sup> :467.4131; [S-Mo] <sup>+</sup> :549.4871   |                          |                   |      |
|       |          |                                                              | S-Lo-Ca  | [Ca-Lo] <sup>+</sup> :409.3309; [S-Ca] <sup>+</sup> :495.4399; [S-Lo] <sup>+</sup> :521.4576   |                          |                   |      |
|       |          |                                                              | O-P-Co   | [Co-P] <sup>+</sup> :411.3476; [O-Co] <sup>+</sup> :437.3657; [O-P] <sup>+</sup> :577.5255     |                          |                   |      |
|       |          |                                                              | O-M-Cy   | [Cy-M] <sup>+</sup> :411.3476; [O-Cy] <sup>+</sup> :465.3920; [O-M] <sup>+</sup> :549.4871     |                          |                   |      |
|       |          |                                                              | O-La-Ca  | [Ca-La] <sup>+</sup> :411.3476; [O-Ca] <sup>+</sup> :493.4264; [O-La] <sup>+</sup> :521.4576   |                          |                   |      |
|       |          |                                                              | P-Po-Cy  | [Cy-Po] <sup>+</sup> :437.3657; [P-Cy] <sup>+</sup> :439.3791; [P-Po] <sup>+</sup> :549.4871   |                          |                   |      |
|       |          |                                                              | P-Mo-Ca  | [Ca-Mo] <sup>+</sup> :437.3657; [P-Ca] <sup>+</sup> :467.4131; [P-Mo] <sup>+</sup> :521.4576   |                          |                   |      |
|       |          |                                                              | P-La-Lo  | [Lo-La] <sup>+</sup> :437.3657; [P-Lo] <sup>+</sup> :493.4264; [P-La] <sup>+</sup> :495.4399   |                          |                   |      |
|       |          |                                                              | Po-M-Ca  | [Ca-M] <sup>+</sup> :439.3791; [Po-Ca] <sup>+</sup> :465.3920; [Po-M] <sup>+</sup> :521.4576   |                          |                   |      |
|       |          |                                                              | Po-La-La | [La-La] <sup>+</sup> :439.3791; [Po-La] <sup>+</sup> :493.4264                                 |                          |                   |      |
|       |          |                                                              | M-M-Lo   | [Lo-M] <sup>+</sup> :465.3920; [M-M] <sup>+</sup> :495.4399                                    |                          |                   |      |
|       |          |                                                              | M-Mo-La  | [La-Mo] <sup>+</sup> :465.3920; [M-La] <sup>+</sup> :467.4131; [M-Mo] <sup>+</sup> :493.4264   |                          |                   |      |
|       |          |                                                              | De-M-P   | [P-M] <sup>+</sup> :523.4660; [De-P] <sup>+</sup> :465.3920; [De-M] <sup>+</sup> :437.3657     |                          |                   |      |
|       |          |                                                              | De-S-La  | [La-S] <sup>+</sup> :523.4660; [De-La] <sup>+</sup> :409.3309; [De-S] <sup>+</sup> :493.4264   |                          |                   |      |
| 7.855 | 708.6151 | C <sub>43</sub> H <sub>82</sub> NO <sub>6</sub> <sup>+</sup> | O-O-Bu   | [Bu-O] <sup>+</sup> :409.3301; [O-O] <sup>+</sup> :603.5345                                    | 1.92 ± 0.01 <sup>b</sup> | 2.60 ±            | 40:2 |
|       |          |                                                              | O-Po-Co  | [Co-Po] <sup>+</sup> :409.3301; [O-Co] <sup>+</sup> :437.3416; [O-Po] <sup>+</sup> :575.4874   |                          | 0.08 <sup>a</sup> |      |
|       |          |                                                              | O-Mo-Cy  | [Cy-Mo] <sup>+</sup> :409.3301; [O-Cy] <sup>+</sup> :465.3869; [O-Mo] <sup>+</sup> :547.4874   |                          |                   |      |
|       |          |                                                              | O-Lo-Ca  | [Ca-Lo] <sup>+</sup> :409.3301; [O-Ca] <sup>+</sup> :493.4282; [O-Lo] <sup>+</sup> :519.4453   |                          |                   |      |
|       |          |                                                              | P-Lo-Lo  | [Lo-Lo] <sup>+</sup> :435.3163; [P-Lo] <sup>+</sup> :493.4282                                  |                          |                   |      |
|       |          |                                                              | Po-Po-Cy | [Cy-Po] <sup>+</sup> :437.3416; [Po-Po] <sup>+</sup> :547.4874                                 |                          |                   |      |
|       |          |                                                              | Po-Mo-Ca | [Ca-Mo] <sup>+</sup> :437.3416; [Po-Ca] <sup>+</sup> :465.3869; [Po-Mo] <sup>+</sup> :519.4453 |                          |                   |      |
|       |          |                                                              | Po-La-Lo | [Lo-La] <sup>+</sup> :437.3416; [Po-Lo] <sup>+</sup> :491.4105; [Po-La] <sup>+</sup> :493.4282 |                          |                   |      |
|       |          |                                                              | M-Mo-Lo  | [Lo-Mo] <sup>+</sup> :463.3733; [M-Lo] <sup>+</sup> :465.3869; [M-Mo] <sup>+</sup> :493.4282   |                          |                   |      |
|       |          |                                                              | Mo-Mo-La | [La-Mo] <sup>+</sup> :465.3869; [Mo-Mo] <sup>+</sup> :491.4105                                 |                          |                   |      |
|       |          |                                                              | Ca-L-La  | [La-L] <sup>+</sup> :519.4453; [Ca-La] <sup>+</sup> :411.3484; [Ca-L] <sup>+</sup> :491.4105   |                          |                   |      |
|       |          |                                                              | L-P-Co   | [Co-P] <sup>+</sup> :411.3484; [L-Co] <sup>+</sup> :435.3163; [L-P] <sup>+</sup> :575.4874     |                          |                   |      |
|       |          |                                                              | L-M-Cy   | [Cy-M] <sup>+</sup> :411.3484; [L-Cy] <sup>+</sup> :463.3733; [L-M] <sup>+</sup> :547.4874     |                          |                   |      |
| 7.919 | 706.6003 | C <sub>43</sub> H <sub>80</sub> NO <sub>6</sub> <sup>+</sup> | O-L-Bu   | [Bu-L] <sup>+</sup> :407.3161; [O-Bu] <sup>+</sup> :409.3340; [O-L] <sup>+</sup> :601.5182     | 0.28 ± 0.01 <sup>b</sup> | 0.44 ±            | 40:3 |
|       |          |                                                              |          |                                                                                                |                          | 0.07 <sup>a</sup> |      |
| 7.950 | 726.6642 | C <sub>44</sub> H <sub>88</sub> NO <sub>6</sub> <sup>+</sup> | S-Pe-Cy  | [Cy-Pe] <sup>+</sup> :425.3679; [S-Cy] <sup>+</sup> :467.4133; [S-Pe] <sup>+</sup> :565.5246   | 1.12 ± 0.01 <sup>b</sup> | 1.18 ±            | 41:0 |
|       |          |                                                              | Ma-P-Cy  | [Cy-P] <sup>+</sup> :439.3772; [Ma-Cy] <sup>+</sup> :453.3950; [Ma-P] <sup>+</sup> :565.5246   |                          | 0.01 <sup>a</sup> |      |
|       |          |                                                              | Ma-M-Ca  | [Ca-M] <sup>+</sup> :439.3772; [Ma-Ca] <sup>+</sup> :481.4189; [Ma-M] <sup>+</sup> :537.4926   |                          |                   |      |

|       |          |                                                              |          |                                                                                                |                          |                   |      |
|-------|----------|--------------------------------------------------------------|----------|------------------------------------------------------------------------------------------------|--------------------------|-------------------|------|
| 7.982 | 740.6712 | C <sub>47</sub> H <sub>94</sub> NO <sub>6</sub> <sup>+</sup> | P-Pe-Ca  | [Ca-Pe] <sup>+</sup> :453.3950; [P-Ca] <sup>+</sup> :467.4133; [P-Pe] <sup>+</sup> :537.4926   |                          |                   |      |
|       |          |                                                              | S-M-Ca   | [Ca-M] <sup>+</sup> :439.3820; [S-Ca] <sup>+</sup> :495.4424; [S-M] <sup>+</sup> :551.5062     | 14.10 ±                  | 6.15 ±            | 42:0 |
|       |          |                                                              | P-P-Ca   | [Ca-P] <sup>+</sup> :467.4118; [P-P] <sup>+</sup> :551.5062                                    | 0.27 <sup>a</sup>        | 0.07 <sup>b</sup> |      |
|       |          |                                                              | S-P-Cy   | [Cy-P] <sup>+</sup> :439.3820; [S-Cy] <sup>+</sup> :467.4118; [S-P] <sup>+</sup> :579.5339     |                          |                   |      |
| 8.100 | 738.6609 | C <sub>45</sub> H <sub>88</sub> NO <sub>6</sub> <sup>+</sup> | P-M-La   | [La-M] <sup>+</sup> :467.4118; [P-La] <sup>+</sup> :495.4424; [P-M] <sup>+</sup> :523.4738     |                          |                   |      |
|       |          |                                                              | O-P-Cy   | [Cy-P] <sup>+</sup> :439.3777; [O-Cy] <sup>+</sup> :465.3987; [O-P] <sup>+</sup> :577.5211     | 3.63 ± 0.03 <sup>a</sup> | 1.69 ±            | 42:1 |
|       |          |                                                              | O-M-Ca   | [Ca-M] <sup>+</sup> :439.3777; [O-Ca] <sup>+</sup> :493.4267; [O-M] <sup>+</sup> :549.4893     |                          | 0.02 <sup>b</sup> |      |
|       |          |                                                              | O-La-La  | [La-La] <sup>+</sup> :439.3777; [O-La] <sup>+</sup> :521.4584                                  |                          |                   |      |
|       |          |                                                              | P-Po-Ca  | [Ca-Po] <sup>+</sup> :465.3987; [P-Ca] <sup>+</sup> :467.4155; [P-Po] <sup>+</sup> :549.4893   |                          |                   |      |
|       |          |                                                              | P-M-Lo   | [Lo-M] <sup>+</sup> :465.3987; [P-Lo] <sup>+</sup> :493.4267; [P-M] <sup>+</sup> :523.4753     |                          |                   |      |
|       |          |                                                              | P-Mo-La  | [La-Mo] <sup>+</sup> :465.3987; [P-La] <sup>+</sup> :495.4426; [P-Mo] <sup>+</sup> :521.4584   |                          |                   |      |
|       |          |                                                              | Po-M-La  | [La-M] <sup>+</sup> :467.4155; [Po-La] <sup>+</sup> :493.4267; [Po-M] <sup>+</sup> :521.4584   |                          |                   |      |
|       |          |                                                              | P-P-De   | [De-P] <sup>+</sup> :465.3987; [P-P] <sup>+</sup> :551.4984                                    |                          |                   |      |
|       |          |                                                              | M-S-De   | [De-S] <sup>+</sup> :493.4267; [M-De] <sup>+</sup> :437.3618; [M-S] <sup>+</sup> :551.4984     |                          |                   |      |
|       |          |                                                              | Ar-Po-Co | [Co-Po] <sup>+</sup> :409.3284; [Ar-Co] <sup>+</sup> :467.4155; [Ar-Po] <sup>+</sup> :605.5229 |                          |                   |      |
|       |          |                                                              | Ar-Mo-Cy | [Cy-Mo] <sup>+</sup> :409.3284; [Ar-Cy] <sup>+</sup> :495.4426; [Ar-Mo] <sup>+</sup> :577.5211 |                          |                   |      |
|       |          |                                                              | Ar-Lo-Ca | [Ca-Lo] <sup>+</sup> :409.3284; [Ar-Ca] <sup>+</sup> :523.4753; [Ar-Lo] <sup>+</sup> :549.4893 |                          |                   |      |
|       |          |                                                              | S-Pe-Ca  | [Ca-Pe] <sup>+</sup> :453.3826; [S-Ca] <sup>+</sup> :495.4454; [S-Pe] <sup>+</sup> :565.52     | 0.05 ± 0.00 <sup>b</sup> | 0.68 ±            | 43:0 |
| 8.456 | 754.6943 | C <sub>46</sub> H <sub>92</sub> NO <sub>6</sub> <sup>+</sup> | Ma-P-Ca  | [Ca-P] <sup>+</sup> :467.4119; [Ma-Ca] <sup>+</sup> :481.4261; [Ma-P] <sup>+</sup> :565.5233   |                          | 0.00 <sup>a</sup> |      |
|       |          |                                                              | Ma-M-La  | [La-M] <sup>+</sup> :467.4119; [Ma-La] <sup>+</sup> :509.4608; [Ma-M] <sup>+</sup> :537.4890   |                          |                   |      |
|       |          |                                                              | P-Pe-La  | [La-Pe] <sup>+</sup> :481.4261; [P-La] <sup>+</sup> :495.4454; [P-Pe] <sup>+</sup> :537.4890   |                          |                   |      |
|       |          |                                                              | S-Ma-Cy  | [Cy-Ma] <sup>+</sup> :453.3826; [S-Cy] <sup>+</sup> :467.4119; [S-Ma] <sup>+</sup> :593.5556   |                          |                   |      |
| 8.456 | 752.6806 | C <sub>46</sub> H <sub>90</sub> NO <sub>6</sub> <sup>+</sup> | O-Pe-Ca  | [Ca-Pe] <sup>+</sup> :453.3947; [O-Ca] <sup>+</sup> :493.4262; [O-Pe] <sup>+</sup> :563.5102   | ND                       | 0.73 ± 0.02       | 43:1 |
|       |          |                                                              | H-P-Ca   | [Ca-P] <sup>+</sup> :467.4101; [H-Ca] <sup>+</sup> :479.4143; [H-P] <sup>+</sup> :563.5102     |                          |                   |      |
|       |          |                                                              | Po-Pe-La | [La-Pe] <sup>+</sup> :481.4284; [Po-La] <sup>+</sup> :493.4262; [Po-Pe] <sup>+</sup> :535.4798 |                          |                   |      |
|       |          |                                                              | Pen-P-La | [La-P] <sup>+</sup> :495.4410; [Pen-La] <sup>+</sup> :479.4143; [Pen-P] <sup>+</sup> :535.4798 |                          |                   |      |
|       |          |                                                              | Mo-Pe-M  | [M-Pe] <sup>+</sup> :509.4605; [Mo-M] <sup>+</sup> :493.4262; [Mo-Pe] <sup>+</sup> :507.4648   |                          |                   |      |
|       |          |                                                              | Pe-P-Lo  | [Lo-P] <sup>+</sup> :493.4262; [Pe-Lo] <sup>+</sup> :479.4143; [Pe-P] <sup>+</sup> :537.4852   |                          |                   |      |
|       |          |                                                              | S-Pe-De  | [De-Pe] <sup>+</sup> :451.3820; [S-De] <sup>+</sup> :493.4262; [S-Pe] <sup>+</sup> :565.5132   |                          |                   |      |
|       |          |                                                              | S-De-Pen | [Pen-De] <sup>+</sup> :451.3820; [S-Pen] <sup>+</sup> :565.5132; [S-De] <sup>+</sup> :495.4410 |                          |                   |      |
|       |          |                                                              | O-M-De   | [De-M] <sup>+</sup> :437.3683; [O-De] <sup>+</sup> :491.4168; [O-M] <sup>+</sup> :549.4951     | 0.03 ± 0.00 <sup>b</sup> | 0.59 ±            | 42:2 |
|       |          |                                                              | O-Mo-Ca  | [Ca-Mo] <sup>+</sup> :437.3683; [O-Ca] <sup>+</sup> :493.4271; [O-Mo] <sup>+</sup> :547.4724   |                          | 0.01 <sup>a</sup> |      |
| 8.574 | 736.6495 | C <sub>45</sub> H <sub>86</sub> NO <sub>6</sub> <sup>+</sup> | L-M-Ca   | [Ca-M] <sup>+</sup> :439.3786; [L-Ca] <sup>+</sup> :491.4168; [L-M] <sup>+</sup> :547.4724     |                          |                   |      |
|       |          |                                                              | P-Po-De  | [De-Po] <sup>+</sup> :463.3842; [P-De] <sup>+</sup> :465.4016; [P-Po] <sup>+</sup> :549.4951   |                          |                   |      |
|       |          |                                                              | M-Mo-Mo  | [Mo-Mo] <sup>+</sup> :491.4168; [M-Mo] <sup>+</sup> :493.4271                                  |                          |                   |      |
|       |          |                                                              | Go-Mo-Cy | [Cy-Mo] <sup>+</sup> :409.3611; [Go-Cy] <sup>+</sup> :493.4271; [Go-Mo] <sup>+</sup> :575.4996 |                          |                   |      |
|       |          |                                                              | S-Mo-De  | [De-Mo] <sup>+</sup> :435.3509; [S-De] <sup>+</sup> :493.4271; [S-Mo] <sup>+</sup> :549.4951   |                          |                   |      |
|       |          |                                                              | O-Po-Cy  | [Cy-Po] <sup>+</sup> :437.3683; [O-Cy] <sup>+</sup> :465.4016; [O-Po] <sup>+</sup> :575.4996   |                          |                   |      |
|       |          |                                                              | L-P-Cy   | [Cy-P] <sup>+</sup> :439.3786; [L-Cy] <sup>+</sup> :463.3842; [L-P] <sup>+</sup> :575.4996     |                          |                   |      |
|       |          |                                                              | Go-P-Co  | [Co-P] <sup>+</sup> :409.3611; [Go-Co] <sup>+</sup> :463.3842; [Go-P] <sup>+</sup> :603.5459   |                          |                   |      |

|       |          |                                                              |          |                                                                                                |                          |                   |      |
|-------|----------|--------------------------------------------------------------|----------|------------------------------------------------------------------------------------------------|--------------------------|-------------------|------|
| 8.646 | 768.7093 | C <sub>47</sub> H <sub>94</sub> NO <sub>6</sub> <sup>+</sup> | S-P-Ca   | [Ca-P] <sup>+</sup> :467.4120; [S-Ca] <sup>+</sup> :495.4405; [S-P] <sup>+</sup> :579.5398     | 3.56 ± 0.03 <sup>a</sup> | 0.11 ±            | 44:0 |
|       |          |                                                              | S-S-Cy   | [Cy-S] <sup>+</sup> :467.4120; [S-S] <sup>+</sup> :607.5645                                    |                          | 0.01 <sup>b</sup> |      |
|       |          |                                                              | Ar-P-Cy  | [Cy-P] <sup>+</sup> :439.3648; [Ar-Cy] <sup>+</sup> :495.4405; [Ar-P] <sup>+</sup> :607.5645   |                          |                   |      |
| 8.720 | 768.7053 | C <sub>47</sub> H <sub>94</sub> NO <sub>6</sub> <sup>+</sup> | S-M-La   | [La-M] <sup>+</sup> :467.4118; [S-La] <sup>+</sup> :523.4743; [S-M] <sup>+</sup> :551.5044     | 1.06 ± 0.01 <sup>a</sup> | 0.97 ±            | 44:0 |
|       |          |                                                              | P-M-M    | [M-M] <sup>+</sup> :495.4416; [P-M] <sup>+</sup> :523.4743                                     |                          | 0.02 <sup>b</sup> |      |
| 8.811 | 766.6907 | C <sub>47</sub> H <sub>92</sub> NO <sub>6</sub> <sup>+</sup> | O-P-Ca   | [Ca-P] <sup>+</sup> :467.4088; [O-Ca] <sup>+</sup> :493.4244; [O-P] <sup>+</sup> :577.5208     | 0.38 ± 0.03 <sup>b</sup> | 5.18 ±            | 44:1 |
|       |          |                                                              | O-M-La   | [La-M] <sup>+</sup> :467.4088; [O-La] <sup>+</sup> :521.4575; [O-M] <sup>+</sup> :549.4867     |                          | 0.14 <sup>a</sup> |      |
|       |          |                                                              | P-Po-La  | [La-Po] <sup>+</sup> :493.4244; [P-La] <sup>+</sup> :495.4409; [P-Po] <sup>+</sup> :549.4867   |                          |                   |      |
|       |          |                                                              | P-M-Mo   | [Mo-M] <sup>+</sup> :493.4244; [P-Mo] <sup>+</sup> :521.4575; [P-M] <sup>+</sup> :523.4719     |                          |                   |      |
|       |          |                                                              | Po-M-M   | [M-M] <sup>+</sup> :495.4409; [Po-M] <sup>+</sup> :521.4575                                    |                          |                   |      |
|       |          |                                                              | S-P-De   | [De-P] <sup>+</sup> :465.3907; [S-De] <sup>+</sup> :493.4244; [S-P] <sup>+</sup> :579.5267     |                          |                   |      |
|       |          |                                                              | S-Mo-La  | [La-Mo] <sup>+</sup> :465.3907; [S-La] <sup>+</sup> :523.4719; [S-Mo] <sup>+</sup> :549.4867   |                          |                   |      |
|       |          |                                                              | O-S-Cy   | [Cy-S] <sup>+</sup> :467.4088; [O-Cy] <sup>+</sup> :465.3907; [O-S] <sup>+</sup> :605.5510     |                          |                   |      |
|       |          |                                                              | S-Po-Ca  | [Ca-Po] <sup>+</sup> :465.3907; [S-Ca] <sup>+</sup> :495.4409; [S-Po] <sup>+</sup> :577.5208   |                          |                   |      |
| 9.285 | 764.6772 | C <sub>47</sub> H <sub>90</sub> NO <sub>6</sub> <sup>+</sup> | O-Po-Ca  | [Ca-Po] <sup>+</sup> :465.3941; [O-Ca] <sup>+</sup> :493.4220; [O-Po] <sup>+</sup> :575.5020   | 0.77 ± 0.00 <sup>b</sup> | 0.88 ±            | 44:2 |
|       |          |                                                              | L-P-Ca   | [Ca-P] <sup>+</sup> :467.4126; [L-Ca] <sup>+</sup> :491.4115; [L-P] <sup>+</sup> :575.5020     |                          | 0.01 <sup>a</sup> |      |
|       |          |                                                              | L-S-Cy   | [Cy-S] <sup>+</sup> :467.4126; [L-Cy] <sup>+</sup> :463.3744 ; [L-S] <sup>+</sup> :603.5362    |                          |                   |      |
|       |          |                                                              | L-P-De   | [De-P] <sup>+</sup> :467.4126; [L-De] <sup>+</sup> :491.4115; [L-P] <sup>+</sup> :577.5207     |                          |                   |      |
|       |          |                                                              | S-Po-De  | [De-Po] <sup>+</sup> :463.3744; [S-De] <sup>+</sup> :493.4220; [S-Po] <sup>+</sup> :577.5207   |                          |                   |      |
| 9.378 | 762.6606 | C <sub>47</sub> H <sub>88</sub> NO <sub>6</sub> <sup>+</sup> | O-L-Cy   | [Cy-L] <sup>+</sup> :463.3793; [O-Cy] <sup>+</sup> :465.397; [O-L] <sup>+</sup> :601.5299      | 0.24 ± 0.01 <sup>a</sup> | 0.21 ±            | 44:3 |
|       |          |                                                              | O-Po-De  | [De-Po] <sup>+</sup> :463.3793; [O-De] <sup>+</sup> :491.4095; [O-Po] <sup>+</sup> :575.4979   |                          | 0.00 <sup>b</sup> |      |
|       |          |                                                              | L-P-De   | [De-P] <sup>+</sup> :465.397; [L-De] <sup>+</sup> :489.3885; [L-P] <sup>+</sup> :575.4979      |                          |                   |      |
|       |          |                                                              | L-Po-Ca  | [Ca-Po] <sup>+</sup> :465.397; [L-Ca] <sup>+</sup> :491.4095; [L-Po] <sup>+</sup> :573.4914    |                          |                   |      |
|       |          |                                                              | Ln-P-Ca  | [Ca-P] <sup>+</sup> :467.4094; [Ln-Ca] <sup>+</sup> :489.3885; [Ln-P] <sup>+</sup> :573.4914   |                          |                   |      |
| 9.425 | 782.7233 | C <sub>48</sub> H <sub>96</sub> NO <sub>6</sub> <sup>+</sup> | S-Ma-Ca  | [Ca-Ma] <sup>+</sup> :481.4243; [S-Ca] <sup>+</sup> :495.4471; [S-Ma] <sup>+</sup> :593.5403   | 0.37 ± 0.01 <sup>b</sup> | 0.43 ±            | 45:0 |
|       |          |                                                              | S-Pe-La  | [La-Pe] <sup>+</sup> :481.4243; [S-La] <sup>+</sup> :523.4765; [S-Pe] <sup>+</sup> :565.5621   |                          | 0.02 <sup>a</sup> |      |
|       |          |                                                              | Ma-P-La  | [La-P] <sup>+</sup> :495.4471; [Ma-La] <sup>+</sup> :509.4581; [Ma-P] <sup>+</sup> :565.5621   |                          |                   |      |
|       |          |                                                              | P-Pe-M   | [M-Pe] <sup>+</sup> :509.4581; [P-M] <sup>+</sup> :523.4765; [P-Pe] <sup>+</sup> :537.4824     |                          |                   |      |
| 9.448 | 780.7103 | C <sub>48</sub> H <sub>94</sub> NO <sub>6</sub> <sup>+</sup> | O-Ma-Ca  | [Ca-Ma] <sup>+</sup> :481.4223; [O-Ca] <sup>+</sup> :493.4251; [O-Ma] <sup>+</sup> :591.5336   | 0.24 ± 0.00 <sup>b</sup> | 0.89 ±            | 45:1 |
|       |          |                                                              | O-Pe-La  | [La-Pe] <sup>+</sup> :481.4223; [O-La] <sup>+</sup> :521.4601; [O-Pe] <sup>+</sup> :563.4905   |                          | 0.01 <sup>a</sup> |      |
|       |          |                                                              | Ma-Po-La | [La-Po] <sup>+</sup> :493.4251; [Ma-La] <sup>+</sup> :509.4567; [Ma-Po] <sup>+</sup> :563.4905 |                          |                   |      |
|       |          |                                                              | Ma-M-Mo  | [Mo-M] <sup>+</sup> :493.4251; [Ma-Mo] <sup>+</sup> :535.4616; [Ma-M] <sup>+</sup> :537.4751   |                          |                   |      |
|       |          |                                                              | H-P-La   | [La-P] <sup>+</sup> :495.4432; [H-La] <sup>+</sup> :507.4404; [H-P] <sup>+</sup> :563.4905     |                          |                   |      |
|       |          |                                                              | H-M-M    | [M-M] <sup>+</sup> :495.4432; [H-M] <sup>+</sup> :535.4616                                     |                          |                   |      |
| 9.471 | 796.7405 | C <sub>49</sub> H <sub>96</sub> NO <sub>6</sub> <sup>+</sup> | S-P-La   | [La-P] <sup>+</sup> :495.4413; [S-La] <sup>+</sup> :523.4727; [S-P] <sup>+</sup> :579.5362     | 8.93 ± 0.30 <sup>a</sup> | 0.88 ±            | 46:0 |
|       |          |                                                              | P-P-M    | [M-P] <sup>+</sup> :523.4727; [P-P] <sup>+</sup> :551.5046                                     |                          | 0.01 <sup>b</sup> |      |
|       |          |                                                              | Ar-P-Ca  | [Ca-P] <sup>+</sup> :467.4126; [Ar-Ca] <sup>+</sup> :523.4727; [Ar-P] <sup>+</sup> :607.5650   |                          |                   |      |
|       |          |                                                              | Beh-M-Ca | [Ca-M] <sup>+</sup> :439.3787; [Beh-Ca] <sup>+</sup> :551.5046; [Beh-M] <sup>+</sup> :607.5650 |                          |                   |      |
| 9.663 | 794.7227 | C <sub>49</sub> H <sub>96</sub> NO <sub>6</sub> <sup>+</sup> | S-O-Ca   | [Ca-O] <sup>+</sup> :493.4302; [S-Ca] <sup>+</sup> :495.4447; [S-O] <sup>+</sup> :605.5582     | 1.18 ± 0.04 <sup>a</sup> | 1.28 ±            | 46:1 |
|       |          |                                                              |          |                                                                                                |                          | 0.05 <sup>a</sup> |      |
| 9.754 | 794.7258 | C <sub>49</sub> H <sub>96</sub> NO <sub>6</sub> <sup>+</sup> | O-P-La   | [La-P] <sup>+</sup> :495.44409; [O-La] <sup>+</sup> :521.4586; [O-P] <sup>+</sup> :577.5190    | 0.32 ± 0.01 <sup>b</sup> |                   | 46:1 |

|            |          |                                                              |           |                                                                                                  |                          |        |      |
|------------|----------|--------------------------------------------------------------|-----------|--------------------------------------------------------------------------------------------------|--------------------------|--------|------|
| 9.909      | 792.7107 | C <sub>49</sub> H <sub>94</sub> NO <sub>6</sub> <sup>+</sup> | O-M-M     | [M-M] <sup>+</sup> :495.44409; [O-M] <sup>+</sup> :549.4893                                      | 1.18 ±                   |        |      |
|            |          |                                                              | P-Po-M    | [M-Po] <sup>+</sup> :521.4586; [P-M] <sup>+</sup> :523.4734; [P-Po] <sup>+</sup> :549.4893       | 0.03 <sup>a</sup>        |        |      |
|            |          |                                                              | P-P-Mo    | [Mo-P] <sup>+</sup> :521.4586; [P-P] <sup>+</sup> :551.5009                                      |                          |        |      |
|            |          |                                                              | Go-M-La   | [La-M] <sup>+</sup> :467.4145; [Go-La] <sup>+</sup> :549.4893; [Go-M] <sup>+</sup> :577.5190     |                          |        |      |
|            |          |                                                              | O-O-Ca    | [Ca-O] <sup>+</sup> :493.4272; [O-O] <sup>+</sup> :603.5304                                      | 1.47 ± 0.04 <sup>b</sup> | 4.37 ± | 46:2 |
|            |          |                                                              | O-Po-La   | [La-Po] <sup>+</sup> :493.4272; [O-La] <sup>+</sup> :521.4590; [O-Po] <sup>+</sup> :575.5083     | 0.19 <sup>a</sup>        |        |      |
|            |          |                                                              | P-Po-Mo   | [Mo-Po] <sup>+</sup> :519.4435; [P-Mo] <sup>+</sup> :521.4590; [P-Po] <sup>+</sup> :549.4917     |                          |        |      |
|            |          |                                                              | O-Mo-M    | [M-Mo] <sup>+</sup> :493.4272; [O-M] <sup>+</sup> :549.4917; [O-Mo] <sup>+</sup> :547.4738       |                          |        |      |
|            |          |                                                              | S-Po-Lo   | [Lo-Po] <sup>+</sup> :491.3987; [S-Lo] <sup>+</sup> :521.4590; [S-Po] <sup>+</sup> :577.5272     |                          |        |      |
|            |          |                                                              | S-O-De    | [De-O] <sup>+</sup> :491.3987; [S-De] <sup>+</sup> :493.4272; [S-O] <sup>+</sup> :605.5482       |                          |        |      |
|            |          |                                                              | Po-Po-M   | [M-Po] <sup>+</sup> :521.4590; [Po-Po] <sup>+</sup> :547.4738                                    |                          |        |      |
|            |          |                                                              | S-Mo-Mo   | [Mo-Mo] <sup>+</sup> :491.3987; [S-Mo] <sup>+</sup> :549.4917                                    |                          |        |      |
|            |          |                                                              | L-P-La    | [La-P] <sup>+</sup> :495.4438; [L-La] <sup>+</sup> :519.4435; [L-P] <sup>+</sup> :575.5083       |                          |        |      |
|            |          |                                                              | L-M-M     | [M-M] <sup>+</sup> :495.4438; [L-M] <sup>+</sup> :547.4738                                       |                          |        |      |
| 10.33<br>2 | 790.6936 | C <sub>49</sub> H <sub>92</sub> NO <sub>6</sub> <sup>+</sup> | O-O-De    | [De-O] <sup>+</sup> :491.4067; [O-O] <sup>+</sup> :603.5139                                      | 0.11 ± 0.00 <sup>b</sup> | 0.44 ± | 46:3 |
|            |          |                                                              | O-L-Ca    | [Ca-L] <sup>+</sup> :491.4067; [O-Ca] <sup>+</sup> :493.4273; [O-L] <sup>+</sup> :601.5186       | 0.02 <sup>a</sup>        |        |      |
|            |          |                                                              | O-Po-Lo   | [Lo-Po] <sup>+</sup> :491.4067; [O-Lo] <sup>+</sup> :519.4462; [O-Po] <sup>+</sup> :575.4924     |                          |        |      |
|            |          |                                                              | Ln-S-Ca   | [Ca-S] <sup>+</sup> :495.4396; [Ln-Ca] <sup>+</sup> :489.3986; [Ln-S] <sup>+</sup> :601.5186     |                          |        |      |
|            |          |                                                              | L-S-De    | [De-S] <sup>+</sup> :493.4273; [L-De] <sup>+</sup> :489.3986; [L-S] <sup>+</sup> :603.5139       |                          |        |      |
|            |          |                                                              | Po-Po-Mo  | [Mo-Po] <sup>+</sup> :519.4462; [Po-Po] <sup>+</sup> :547.4758                                   |                          |        |      |
| 10.44<br>7 | 810.7181 | C <sub>50</sub> H <sub>100</sub> NO <sub>6</sub><br>+        | S-Pe-M    | [M-Pe] <sup>+</sup> :509.5443; [S-M] <sup>+</sup> :551.5043; [S-Pe] <sup>+</sup> :565.5245       | 0.37 ± 0.03 <sup>a</sup> | 0.19 ± | 47:0 |
|            |          |                                                              | Ma-P-M    | [M-P] <sup>+</sup> :523.4802; [Ma-M] <sup>+</sup> :537.4909; [Ma-P] <sup>+</sup> :565.5245       | 0.01 <sup>b</sup>        |        |      |
| 10.50<br>4 | 808.7416 | C <sub>50</sub> H <sub>98</sub> NO <sub>6</sub> <sup>+</sup> | No-M-M    | [M-M] <sup>+</sup> :495.4455; [No-M] <sup>+</sup> :563.4995                                      | 0.35 ± 0.03 <sup>b</sup> | 0.43 ± | 47:1 |
|            |          |                                                              | O-Pe-M    | [M-Pe] <sup>+</sup> :509.4578; [O-M] <sup>+</sup> :549.4913; [O-Pe] <sup>+</sup> :563.4995       | 0.00 <sup>a</sup>        |        |      |
|            |          |                                                              | Ma-Po-M   | [M-Po] <sup>+</sup> :521.4575; [Ma-M] <sup>+</sup> :537.4875; [Ma-Po] <sup>+</sup> :563.4995     |                          |        |      |
|            |          |                                                              | Ma-Pe-Pen | [Pen-Pe] <sup>+</sup> :521.4575; [Ma-Pen] <sup>+</sup> :549.4913; [Ma-Pe] <sup>+</sup> :551.5023 |                          |        |      |
|            |          |                                                              | H-Pe-Pe   | [Pe-Pe] <sup>+</sup> :523.4760; [H-Pe] <sup>+</sup> :549.4913                                    |                          |        |      |
| 10.56<br>2 | 824.7719 | C <sub>51</sub> H <sub>102</sub> NO <sub>6</sub><br>+        | P-Po-Pe   | [Pe-Po] <sup>+</sup> :535.4694; [P-Pe] <sup>+</sup> :537.4875; [P-Po] <sup>+</sup> :549.4913     |                          |        |      |
|            |          |                                                              | S-P-M     | [M-P] <sup>+</sup> :523.4703; [S-M] <sup>+</sup> :551.5020; [S-P] <sup>+</sup> :579.5310         | 0.03 ± 0.00 <sup>b</sup> | 0.09 ± | 48:0 |
|            |          |                                                              | P-P-P     | [P-P] <sup>+</sup> :551.5020                                                                     | 0.00 <sup>a</sup>        |        |      |
|            |          |                                                              | Ar-P-La   | [La-P] <sup>+</sup> :495.4424; [Ar-La] <sup>+</sup> :551.5020; [Ar-P] <sup>+</sup> :607.5682     |                          |        |      |
|            |          |                                                              | Ar-M-M    | [M-M] <sup>+</sup> :495.4424; [Ar-M] <sup>+</sup> :579.5310                                      |                          |        |      |
| 10.67<br>2 | 822.7561 | C <sub>51</sub> H <sub>100</sub> NO <sub>6</sub><br>+        | O-P-M     | [M-P] <sup>+</sup> :523.4706; [O-M] <sup>+</sup> :549.4868; [O-P] <sup>+</sup> :577.5182         | 2.24 ± 0.05 <sup>b</sup> | 2.44 ± | 48:1 |
|            |          |                                                              | S-Po-M    | [M-Po] <sup>+</sup> :521.4626; [S-M] <sup>+</sup> :551.5020; [S-Po] <sup>+</sup> :577.5182       | 0.08 <sup>a</sup>        |        |      |
|            |          |                                                              | S-Mo-P    | [P-Mo] <sup>+</sup> :521.4626; [S-P] <sup>+</sup> :579.5309; [S-Mo] <sup>+</sup> :549.4868       |                          |        |      |
|            |          |                                                              | P-P-Po    | [Po-P] <sup>+</sup> :549.4868; [P-P] <sup>+</sup> :551.5020                                      |                          |        |      |
|            |          |                                                              | S-S-Lo    | [Lo-S] <sup>+</sup> :521.4626; [S-S] <sup>+</sup> :607.5341                                      |                          |        |      |
| 10.91<br>7 | 820.7415 | C <sub>51</sub> H <sub>98</sub> NO <sub>6</sub> <sup>+</sup> | O-O-La    | [La-O] <sup>+</sup> :521.4549; [O-O] <sup>+</sup> :603.5394                                      | 0.59 ± 0.03 <sup>b</sup> | 0.76 ± | 48:2 |
|            |          |                                                              | O-P-Mo    | [Mo-P] <sup>+</sup> :521.4549; [O-Mo] <sup>+</sup> :547.4785; [O-P] <sup>+</sup> :577.5272       | 0.00 <sup>a</sup>        |        |      |
|            |          |                                                              | O-Po-M    | [M-Po] <sup>+</sup> :521.4549; [O-M] <sup>+</sup> :549.4933; [O-Po] <sup>+</sup> :575.5081       |                          |        |      |
|            |          |                                                              | P-Po-Po   | [Po-Po] <sup>+</sup> :547.4785; [P-Po] <sup>+</sup> :549.4933                                    |                          |        |      |



|            |          |                                                              |          |                                                                                                |                          |                   |      |
|------------|----------|--------------------------------------------------------------|----------|------------------------------------------------------------------------------------------------|--------------------------|-------------------|------|
|            |          |                                                              | S-Po-Mo  | [Mo-Po] <sup>+</sup> :519.4585; [S-Mo] <sup>+</sup> :549.4933; [S-Po] <sup>+</sup> :577.5272   |                          |                   |      |
|            |          |                                                              | S-O-Lo   | [Lo-O] <sup>+</sup> :519.4585; [S-Lo] <sup>+</sup> :521.4549; [S-O] <sup>+</sup> :605.5237     |                          |                   |      |
|            |          |                                                              | L-S-La   | [La-S] <sup>+</sup> :523.4719; [L-La] <sup>+</sup> :519.4585; [L-S] <sup>+</sup> :603.5394     |                          |                   |      |
|            |          |                                                              | L-P-M    | [M-P] <sup>+</sup> :523.4719; [L-M] <sup>+</sup> :547.4785; [L-P] <sup>+</sup> :575.5081       |                          |                   |      |
| 11.02<br>4 | 818.7282 | C <sub>51</sub> H <sub>96</sub> NO <sub>6</sub> <sup>+</sup> | O-L-La   | [La-L] <sup>+</sup> :519.4471; [O-La] <sup>+</sup> :521.4567; [O-L] <sup>+</sup> :601.5184     | 0.23 ± 0.01 <sup>a</sup> | 0.17 ±            | 48:3 |
|            |          |                                                              | O-Po-Mo  | [Mo-Po] <sup>+</sup> :519.4471; [O-Mo] <sup>+</sup> :547.4750; [O-Po] <sup>+</sup> :575.5078   |                          | 0.00 <sup>b</sup> |      |
|            |          |                                                              | L-P-Mo   | [Mo-P] <sup>+</sup> :521.4567; [L-Mo] <sup>+</sup> :545.4654; [L-P] <sup>+</sup> :575.5078     |                          |                   |      |
|            |          |                                                              | L-Po-M   | [M-Po] <sup>+</sup> :521.4567; [L-M] <sup>+</sup> :547.4750; [L-Po] <sup>+</sup> :573.4930     |                          |                   |      |
|            |          |                                                              | Ln-P-M   | [M-P] <sup>+</sup> :523.4727; [Ln-M] <sup>+</sup> :545.4654; [Ln-P] <sup>+</sup> :573.4930     |                          |                   |      |
| 11.07<br>7 | 838.7857 | C <sub>52</sub> H <sub>104</sub> NO <sub>6</sub>             | S-Ma-M   | [M-Ma] <sup>+</sup> :537.4852; [S-M] <sup>+</sup> :551.5049; [S-Ma] <sup>+</sup> :593.5395     | 0.09 ± 0.01 <sup>b</sup> | 0.12 ±            | 49:0 |
|            |          | +                                                            | S-P-Pe   | [Pe-P] <sup>+</sup> :537.4852; [S-P] <sup>+</sup> :579.5416; [S-Pe] <sup>+</sup> :565.5264     |                          | 0.00 <sup>a</sup> |      |
|            |          |                                                              | Ma-Ma-Pe | [Pe-Ma] <sup>+</sup> :551.5049; [Ma-Ma] <sup>+</sup> :579.5416                                 |                          |                   |      |
| 11.13<br>0 | 836.7768 | C <sub>52</sub> H <sub>102</sub> NO <sub>6</sub>             | S-H-M    | [M-H] <sup>+</sup> :535.7930; [S-M] <sup>+</sup> :551.5072; [S-H] <sup>+</sup> :591.5445       | 0.14 ± 0.00 <sup>b</sup> | 0.20 ±            | 49:1 |
|            |          | +                                                            | O-P-Pe   | [Pe-P] <sup>+</sup> :537.4899; [O-Pe] <sup>+</sup> :563.5214; [O-P] <sup>+</sup> :577.5214     |                          | 0.00 <sup>a</sup> |      |
|            |          |                                                              | Ma-H-Pe  | [Pe-H] <sup>+</sup> :549.4925 ; [Ma-Pe] <sup>+</sup> :551.5072; [Ma-H] <sup>+</sup> :577.5214  |                          |                   |      |
|            |          |                                                              | H-P-P    | [P-P] <sup>+</sup> :551.5072; [H-P] <sup>+</sup> :563.5214                                     |                          |                   |      |
|            |          |                                                              | S-Ma-Mo  | [Mo-Ma] <sup>+</sup> :535.7930; [S-Mo] <sup>+</sup> :549.4925; [S-Ma] <sup>+</sup> :593.5431   |                          |                   |      |
|            |          |                                                              | O-S-Tr   | [Tr-S] <sup>+</sup> :537.4899; [O-Tr] <sup>+</sup> :535.7930; [O-S] <sup>+</sup> :605.5498     |                          |                   |      |
| 11.36<br>5 | 834.7649 | C <sub>52</sub> H <sub>100</sub> NO <sub>6</sub>             | O-H-M    | [M-H] <sup>+</sup> :535.4683; [O-M] <sup>+</sup> :549.4814; [O-H] <sup>+</sup> :589.5240       | ND                       | 0.08 ± 0.00       | 49:2 |
|            |          | +                                                            | O-Po-Pe  | [Pe-Po] <sup>+</sup> :535.4683; [O-Pe] <sup>+</sup> :563.5098; [O-Po] <sup>+</sup> :575.4991   |                          |                   |      |
|            |          |                                                              | L-Ma-M   | [M-Ma] <sup>+</sup> :537.4938; [L-M] <sup>+</sup> :547.4705; [L-Ma] <sup>+</sup> :589.5240     |                          |                   |      |
|            |          |                                                              | L-P-Pe   | [Pe-P] <sup>+</sup> :537.4938; [L-Pe] <sup>+</sup> :561.4965; [L-P] <sup>+</sup> :575.4991     |                          |                   |      |
|            |          |                                                              | H-H-Pe   | [Pe-H] <sup>+</sup> :549.4814; [H-H] <sup>+</sup> :575.4991                                    |                          |                   |      |
|            |          |                                                              | H-P-Po   | [Po-P] <sup>+</sup> :549.4814; [H-Po] <sup>+</sup> :561.4965; [H-P] <sup>+</sup> :563.5098     |                          |                   |      |
|            |          |                                                              | O-Ma-Mo  | [Mo-Ma] <sup>+</sup> :535.4683; [O-Mo] <sup>+</sup> :547.4705; [O-Ma] <sup>+</sup> :591.5600   |                          |                   |      |
| 11.51<br>9 | 852.8041 | C <sub>53</sub> H <sub>106</sub> NO <sub>6</sub>             | S-P-P    | [P-P] <sup>+</sup> :551.5048; [S-P] <sup>+</sup> :579.5347                                     | 0.45 ± 0.03 <sup>b</sup> | 0.66 ±            | 50:0 |
|            |          | +                                                            | Ar-P-M   | [M-P] <sup>+</sup> :523.4764; [Ar-M] <sup>+</sup> :579.5347; [Ar-P] <sup>+</sup> :607.5732     |                          | 0.01 <sup>a</sup> |      |
|            |          |                                                              | Beh-M-M  | [M-M] <sup>+</sup> :495.4517; [Beh-M] <sup>+</sup> :607.5732                                   |                          |                   |      |
| 11.59<br>3 | 850.7817 | C <sub>53</sub> H <sub>104</sub> NO <sub>6</sub>             | S-O-M    | [M-O] <sup>+</sup> :549.4885; [S-M] <sup>+</sup> :551.5026; [S-O] <sup>+</sup> :605.5463       | 4.82 ± 0.07 <sup>a</sup> | 3.46 ±            | 50:1 |
|            |          | +                                                            | O-P-P    | [P-P] <sup>+</sup> :551.5026; [O-P] <sup>+</sup> :577.5152                                     |                          | 0.01 <sup>b</sup> |      |
|            |          |                                                              | Go-P-M   | [M-P] <sup>+</sup> :523.4730; [Go-M] <sup>+</sup> :577.5152; [Go-P] <sup>+</sup> :605.5463     |                          |                   |      |
|            |          |                                                              | S-S-Mo   | [Mo-S] <sup>+</sup> :549.4885; [S-S] <sup>+</sup> :607.5656                                    |                          |                   |      |
|            |          |                                                              | S-P-Po   | [Po-P] <sup>+</sup> :549.4885; [S-Po] <sup>+</sup> :577.5152; [S-P] <sup>+</sup> :579.5328     |                          |                   |      |
| 11.83<br>0 | 848.7693 | C <sub>53</sub> H <sub>102</sub> NO <sub>6</sub>             | O-P-Po   | [Po-P] <sup>+</sup> :549.4889; [O-Po] <sup>+</sup> :575.5103; [O-P] <sup>+</sup> :577.5217     | 0.42 ± 0.06 <sup>b</sup> | 1.17 ±            | 50:2 |
|            |          | +                                                            | O-O-M    | [M-O] <sup>+</sup> :549.4889; [O-O] <sup>+</sup> :603.5364                                     |                          | 0.03 <sup>a</sup> |      |
|            |          |                                                              | S-O-Mo   | [Mo-O] <sup>+</sup> :547.4779; [S-Mo] <sup>+</sup> :549.4889; [S-O] <sup>+</sup> :605.5458     |                          |                   |      |
| 11.94<br>9 | 846.7548 | C <sub>53</sub> H <sub>100</sub> NO <sub>6</sub>             | O-O-Mo   | [Mo-O] <sup>+</sup> :547.4079; [O-O] <sup>+</sup> :603.5284                                    | 0.08 ± 0.01 <sup>b</sup> | 0.28 ±            | 50:3 |
|            |          | +                                                            | O-L-M    | [M-L] <sup>+</sup> :547.4079; [O-M] <sup>+</sup> :549.4863; [O-L] <sup>+</sup> :601.5201       |                          | 0.01 <sup>a</sup> |      |
|            |          |                                                              | L-P-Po   | [Po-P] <sup>+</sup> :549.4863; [L-Po] <sup>+</sup> :573.4880; [L-P] <sup>+</sup> :575.5060     |                          |                   |      |
|            |          |                                                              | Ln-P-P   | [P-P] <sup>+</sup> :551.5009; [Ln-P] <sup>+</sup> :573.4880                                    |                          |                   |      |
| 12.06<br>8 | 864.8017 | C <sub>54</sub> H <sub>106</sub> NO <sub>6</sub>             | No-Ma-Pe | [Pe-Ma] <sup>+</sup> :551.5150; [No-Pe] <sup>+</sup> :577.5186; [No-Ma] <sup>+</sup> :605.5285 | ND                       | 0.26 ± 0.01       | 51:1 |

|       |          |                                                  |           |                                                                                                  |                          |                   |      |
|-------|----------|--------------------------------------------------|-----------|--------------------------------------------------------------------------------------------------|--------------------------|-------------------|------|
|       |          |                                                  | No-P-P    | [P-P] <sup>+</sup> :551.5150; [No-P] <sup>+</sup> :591.5280                                      |                          |                   |      |
|       |          |                                                  | S-O-Pe    | [Pe-O] <sup>+</sup> :563.5051; [S-Pe] <sup>+</sup> :565.5168; [S-O] <sup>+</sup> :605.5285       |                          |                   |      |
|       |          |                                                  | O-Ma-P    | [P-Ma] <sup>+</sup> :565.5168; [O-P] <sup>+</sup> :577.5186; [O-Ma] <sup>+</sup> :591.5280       |                          |                   |      |
| 12.25 | 862.7877 | C <sub>54</sub> H <sub>104</sub> NO <sub>6</sub> | O-O-Pe    | [Pe-O] <sup>+</sup> :563.5052; [O-O] <sup>+</sup> :603.5369                                      | 0.05 ± 0.01 <sup>b</sup> | 0.10 ±            | 51:2 |
| 1     |          | +                                                | O-Ma-Po   | [Po-Ma] <sup>+</sup> :563.5052; [O-Po] <sup>+</sup> :575.4844; [O-Ma] <sup>+</sup> :591.5364     |                          | 0.00 <sup>a</sup> |      |
|       |          |                                                  | O-H-P     | [P-H] <sup>+</sup> :563.5052; [O-P] <sup>+</sup> :577.5157; [O-H] <sup>+</sup> :589.5279         |                          |                   |      |
|       |          |                                                  | L-Ma-P    | [P-Ma] <sup>+</sup> :565.5178; [L-P] <sup>+</sup> :575.4844; [L-Ma] <sup>+</sup> :589.5279       |                          |                   |      |
|       |          |                                                  | No-H-Pe   | [Pe-H] <sup>+</sup> :549.4899; [No-Pe] <sup>+</sup> :577.5157; [No-H] <sup>+</sup> :603.5369     |                          |                   |      |
|       |          |                                                  | No-Ma-Pen | [Pen-Ma] <sup>+</sup> :549.4899; [No-Pen] <sup>+</sup> :575.4844; [No-Ma] <sup>+</sup> :605.5588 |                          |                   |      |
|       |          |                                                  | No-S-Mo   | [Mo-S] <sup>+</sup> :549.4899; [No-Mo] <sup>+</sup> :561.4742; [No-S] <sup>+</sup> :619.7220     |                          |                   |      |
|       |          |                                                  | No-O-M    | [M-O] <sup>+</sup> :549.4899; [No-M] <sup>+</sup> :563.5052; [No-O] <sup>+</sup> :617.5646       |                          |                   |      |
|       |          |                                                  | L-S-Pe    | [Pe-S] <sup>+</sup> :565.5178; [L-Pe] <sup>+</sup> :561.4742; [L-S] <sup>+</sup> :603.5369       |                          |                   |      |
|       |          |                                                  | Po-S-H    | [H-S] <sup>+</sup> :591.5364; [Po-H] <sup>+</sup> :561.4742; [Po-S] <sup>+</sup> :577.5157       |                          |                   |      |
| 12.36 | 860.7770 | C <sub>54</sub> H <sub>102</sub> NO <sub>6</sub> | O-L-Pe    | [Pe-L] <sup>+</sup> :561.4814; [O-L] <sup>+</sup> :601.5345; [O-Pe] <sup>+</sup> :563.5072       | 0.10 ± 0.00 <sup>a</sup> | 0.10 ±            | 51:3 |
| 3     |          | +                                                | O-H-Po    | [Po-H] <sup>+</sup> :561.4814; [O-Po] <sup>+</sup> :575.5125; [O-H] <sup>+</sup> :589.5167       |                          | 0.02 <sup>a</sup> |      |
| 12.47 | 880.8372 | C <sub>55</sub> H <sub>110</sub> NO <sub>6</sub> | Ar-P-P    | [P-P] <sup>+</sup> :551.5081; [Ar-P] <sup>+</sup> :607.5637                                      | 0.32 ± 0.02 <sup>a</sup> | 0.03 ±            | 52:0 |
| 3     |          | +                                                | S-S-P     | [P-S] <sup>+</sup> :579.5384; [S-S] <sup>+</sup> :607.5637                                       |                          | 0.00 <sup>b</sup> |      |
| 12.63 | 878.8212 | C <sub>55</sub> H <sub>108</sub> NO <sub>6</sub> | S-O-P     | [P-O] <sup>+</sup> :577.5182; [S-P] <sup>+</sup> :579.5346; [S-O] <sup>+</sup> :605.5522         | 0.28 ± 0.02 <sup>b</sup> | 0.90 ±            | 52:1 |
| 8     |          | +                                                | Ar-P-Po   | [Po-P] <sup>+</sup> :549.4811; [Ar-Po] <sup>+</sup> :605.5522; [Ar-P] <sup>+</sup> :607.5670     |                          | 0.01 <sup>a</sup> |      |
|       |          |                                                  | Go-P-P    | [P-P] <sup>+</sup> :551.5057; [Go-P] <sup>+</sup> :605.5522                                      |                          |                   |      |
| 12.71 | 876.8040 | C <sub>55</sub> H <sub>106</sub> NO <sub>6</sub> | O-P-O     | [O-P] <sup>+</sup> :577.5212; [O-O] <sup>+</sup> :603.5396                                       | 4.09 ± 0.31 <sup>b</sup> | 6.44 ±            | 52:2 |
| 0     |          | +                                                | L-P-S     | [S-P] <sup>+</sup> :579.5291; [L-S] <sup>+</sup> :603.5396; [L-P] <sup>+</sup> :575.5015         |                          | 0.20 <sup>a</sup> |      |
| 13.14 | 874.7872 | C <sub>55</sub> H <sub>104</sub> NO <sub>6</sub> | O-L-P     | [P-L] <sup>+</sup> :575.5043; [O-P] <sup>+</sup> :577.5184; [O-L] <sup>+</sup> :601.5167         | 0.55 ± 0.05 <sup>b</sup> | 1.03 ±            | 52:3 |
| 9     |          | +                                                | Di-P-P    | [P-P] <sup>+</sup> :551.4954; [Di-P] <sup>+</sup> :601.5167                                      |                          | 0.04 <sup>a</sup> |      |
|       |          |                                                  | Ln-S-P    | [P-S] <sup>+</sup> :579.5158; [Ln-P] <sup>+</sup> :573.4679; [Ln-S] <sup>+</sup> :601.5167       |                          |                   |      |
|       |          |                                                  | S-L-Po    | [Po-L] <sup>+</sup> :573.4679; [S-Po] <sup>+</sup> :577.5184; [S-L] <sup>+</sup> :603.5374       |                          |                   |      |
|       |          |                                                  | O-O-Po    | [Po-O] <sup>+</sup> :575.5043; [O-O] <sup>+</sup> :603.5374                                      |                          |                   |      |
| 13.38 | 872.7766 | C <sub>55</sub> H <sub>102</sub> NO <sub>6</sub> | ARA-P-P   | [P-P] <sup>+</sup> :551.5228; [ARA-P] <sup>+</sup> :599.5119                                     | 0.03 ± 0.00 <sup>b</sup> | 0.20 ±            | 52:4 |
| 7     |          | +                                                | O-L-Po    | [Po-L] <sup>+</sup> :573.4722; [O-Po] <sup>+</sup> :575.4924; [O-L] <sup>+</sup> :601.5225       |                          | 0.01 <sup>a</sup> |      |
|       |          |                                                  | O-Ln-P    | [P-Ln] <sup>+</sup> :573.4722; [O-P] <sup>+</sup> :577.5264; [O-Ln] <sup>+</sup> :599.5119       |                          |                   |      |
|       |          |                                                  | L-L-P     | [P-L] <sup>+</sup> :575.4924; [L-L] <sup>+</sup> :599.5119                                       |                          |                   |      |
| 13.47 | 890.8211 | C <sub>56</sub> H <sub>108</sub> NO <sub>6</sub> | No-Ma-H   | [H-Ma] <sup>+</sup> :577.5147; [No-H] <sup>+</sup> :603.5295; [No-Ma] <sup>+</sup> :605.5561     | 0.21 ± 0.01 <sup>b</sup> | 0.32 ±            | 53:2 |
| 6     |          | +                                                | O-O-Ma    | [Ma-O] <sup>+</sup> :591.5372; [O-O] <sup>+</sup> :603.5295                                      |                          | 0.00 <sup>a</sup> |      |
| 13.56 | 888.8082 | C <sub>56</sub> H <sub>106</sub> NO <sub>6</sub> | O-O-H     | [H-O] <sup>+</sup> :589.5126; [O-O] <sup>+</sup> :603.5280                                       | 0.11 ± 0.01 <sup>a</sup> | 0.11 ±            | 53:3 |
| 4     |          | +                                                | O-L-Ma    | [Ma-L] <sup>+</sup> :589.5126; [O-Ma] <sup>+</sup> :591.5402; [O-L] <sup>+</sup> :601.5248       |                          | 0.01 <sup>a</sup> |      |
| 13.62 | 906.8683 | C <sub>57</sub> H <sub>112</sub> NO <sub>6</sub> | Beh-P-Po  | [Po-P] <sup>+</sup> :549.4929; [Beh-Po] <sup>+</sup> :633.5734; [Beh-P] <sup>+</sup> :635.5895   | 0.19 ± 0.01 <sup>b</sup> | 0.28 ±            | 54:1 |
| 4     |          | +                                                | Er-P-P    | [P-P] <sup>+</sup> :551.4932; [Er-P] <sup>+</sup> :633.5734                                      |                          | 0.01 <sup>a</sup> |      |
|       |          |                                                  | Ar-S-Po   | [Po-S] <sup>+</sup> :577.5233; [Ar-Po] <sup>+</sup> :605.5491; [Ar-S] <sup>+</sup> :635.5895     |                          |                   |      |
|       |          |                                                  | Ar-O-P    | [P-O] <sup>+</sup> :577.5233; [Ar-P] <sup>+</sup> :607.5693; [Ar-O] <sup>+</sup> :633.5734       |                          |                   |      |
|       |          |                                                  | Go-S-P    | [P-S] <sup>+</sup> :579.5262; [Go-P] <sup>+</sup> :605.5491; [Go-S] <sup>+</sup> :633.5734       |                          |                   |      |
|       | 904.8342 |                                                  | S-O-O     | [O-O] <sup>+</sup> :603.5375; [S-O] <sup>+</sup> :605.5510                                       | 0.13 ± 0.01 <sup>b</sup> |                   | 54:2 |

|       |          |                                                  |         |                                                       |                          |                   |      |
|-------|----------|--------------------------------------------------|---------|-------------------------------------------------------|--------------------------|-------------------|------|
| 13.74 |          | C <sub>57</sub> H <sub>110</sub> NO <sub>6</sub> | L-S-S   | [S-S]*:607.5631; [L-S]*:603.5375                      |                          | 0.39 ±            |      |
| 3     |          | +                                                |         |                                                       |                          | 0.02 <sup>a</sup> |      |
| 13.87 | 902.8211 | C <sub>57</sub> H <sub>108</sub> NO <sub>6</sub> | O-O-O   | [O-O]*:603.5378                                       | 0.39 ± 0.04 <sup>b</sup> | 2.61 ±            | 54:3 |
| 0     |          | +                                                |         |                                                       |                          | 0.11 <sup>a</sup> |      |
| 14.30 | 902.8203 | C <sub>57</sub> H <sub>108</sub> NO <sub>6</sub> | S-O-L   | [L-O]*:601.5290; [S-L]*:603.5383; [S-O]*:605.5518     | 0.23 ± 0.01 <sup>b</sup> | 0.33 ±            | 54:3 |
| 9     |          | +                                                | Ln-S-S  | [S-S]*:607.5652; [Ln-S]*:601.5290                     |                          | 0.00 <sup>a</sup> |      |
| 14.36 | 900.8062 | C <sub>57</sub> H <sub>106</sub> NO <sub>6</sub> | O-O-L   | [L-O]*:601.5163; [O-O]*:603.5383                      | 0.18 ± 0.01 <sup>b</sup> | 2.02 ±            | 54:4 |
| 6     |          | +                                                | Ln-O-S  | [S-O]*:605.5476; [Ln-S]*:601.5163; [Ln-O]*:599.5190   |                          | 0.09 <sup>a</sup> |      |
|       |          |                                                  | L-L-S   | [S-L]*:603.5383; [L-L]*:599.5190                      |                          |                   |      |
| 14.85 | 898.7900 | C <sub>57</sub> H <sub>104</sub> NO <sub>6</sub> | Gln-O-O | [O-O]*:603.5295; [Gln-O]*:599.5087                    | ND                       | 0.04 ± 0.00       | 54:5 |
| 6     |          | +                                                | ARA-O-P | [P-O]*:577.5115; [ARA-P]*:599.5087; [ARA-O]*:625.5305 |                          |                   |      |

tr, retention time (min); \* GZG, Guanzhong goat milk; \*\* XSG, Xinong Saanen goat milk; ACN, acyl carbon number; DB, double bonds number; abbreviations of FAs used in structure of TAGs: Bu, butyric acid (C4:0); Co, caproic acid (C6:0); Cy, caprylic acid (C8:0); Ca, capric acid (C10:0); De, decanoic acid (C10:1); Ud, undecanoic acid (C11:0); La, lauric acid (C12:0); Lo, lauroleic acid (C12:1); Tr, tridecanoic acid (C13:0); M, myristic acid (C14:0); Mo, myristoleic acid (C14:1 n-5c); Pe, pentadecylic acid (C15:0); Pen, pentadecenoic acid (C15:1 n-5c); P, palmitic acid (C16:0); Po, palmitoleic acid (C16:1 n-7c); Ma, margaric acid (C17:0); H, heptadecenoic acid (C17:1 n-7t); S, stearic acid (C18:0); O, oleic acid (C18:1 n-9c); L, linoleic acid (C18:2 n-6c); Ln, alpha-linolenic acid (C18:3 n-3c); Gln, gamma-linolenic acid (C18:3 n-6c); N, nonadecanoic acid (C19:0); No, nonadecenoic acid (C19:1); Ar, arachidic acid (C20:0); Go, gadoleic acid (C20:1); ARA, arachidonic acid (C20:4 n-6c); Beh, behenic acid (C22:0); Er, erucic acid (C22:1). X–Y–Z: structure of TAGs, i.e., O–P–Cy stands for oleoyl–palmitoyl–capryloyl–glycerol structure; regiospecificity of the FAs in the TAGs was not determined. Results represent mean ± standard deviation, n = 3. Presented values with the different superscript letters (within a row) are significantly different by independent samples *t*-test (*p* ≤ 0.05). ND, not detected.
